# Supplementary material
Source: HighWire-hosted journal article supplement (https://bmjopen.bmj.com/content/15/1/e083653)
Supplement: inline-supplementary-material-1 [file inline-supplementary-material-1.pdf]

Table S1 Logistic regression analysis variable assignment table

| Variables                                              | Assignment                                                                                           |
|--------------------------------------------------------|------------------------------------------------------------------------------------------------------|
| Age                                                    | 1 = 20~30 years, 2 = 31~40 years,<br>3=41~50 years,4 = 51~60 years                                   |
| Level of education                                     | 1 = primary school and below, 2=junior high school,<br>3= highschool,4=college, 5=Master's and above |
| Self-perceived level of impact of the epidemic on life | 0 =almost no effect,<br>1 = very bad effect,<br>2=a little bad effect                                |
| Concerns about the child's learning status             | 1=indifferent, 2=concerned, 3=actively<br>4 = accompanying the child                                 |
| Current state of physical health                       | 1 = very healthy, 2 = good, 3 = General                                                              |
